# Supplementary material for: Reagent controlled addition of chiral sulfur ylides to chiral aldehydes
Source: Beilstein J Org Chem. 2005 Aug 26;1:4. doi: 10.1186/1860-5397-1-4 (PMC1399452; doi:10.1186/1860-5397-1-4)
Supplement: File 1 — Experimental details [file Beilstein_J_Org_Chem-01-04-s001.doc]

**Experimental**

**General Procedure for Epoxidation at Low Temperature using P2 Base**

To a solution of the sulfonium salt (0.50 mmol) in anhydrous dichloromethane (0.7 mL) was added *N*,*N*,*N′*,*N′*-tetramethyl-*N″*-[tris(dimethylamino)phosphoralidene] phosphoric triamide ethylimine (0.50 mmol) at -78 °C. After stirring for 10–15 min a solution of the desired aldehyde (0.50 mmol) in anhydrous dichloromethane (1.0 mL) was added dropwise and the reaction mixture was stirred for 1.5 hours at -78 °C. After addition of water (20 mL), the organic phase was separated and the aqueous phase extracted with CH2Cl2 (2 × 20 mL). The organic phases were combined, dried over magnesium sulfate, filtered and concentrated in vacuum. Purification by column chromatography yields the pure epoxides as one *cis* diastereomer and a mixture of two *trans* diastereomers.

**1-Phenyl-2-[(*R*)-2,2-dimethyl-1,3-dioxolan-4-yl] oxirane (7).1**

The mixture of two *trans* epoxides (1*R*,2*S*)-1-Phenyl-2-[(*R*)-2,2-dimethyl-1,3- dioxolan-4-yl] oxirane(**7a**) and (1*S*,2*R*)-1-Phenyl-2-[(*R*)-2,2-dimethyl-1,3-dioxolan -4-yl] oxirane (**7b**) was obtained as a pale yellow oil, R*f*(10 %EtOAc in petroleum) 0.31; max/cm-1 2987 (CH), 1253, 1212, 840; H (400 MHz, CDCl3) **7a**: 1.40 (3H, s, CH3), 1.46 (3H, s, CH3), 3.09-3.11 (1H, dd, *J* 5.8 Hz and 2.0 Hz, C**2**H), 3.80 (1H, d, *J* 2.0 Hz, C**1**HPh), 3.98-4.01 (1H, dd, *J* 7.8 Hz and 5.8 Hz, C**4***H*H), 4.02-4.06 (1H, q, *J* 5.8Hz, C**3**H), 4.18 (1H, dd, *J* 7.8 Hz and 5.8 Hz, C**4**H*H*), 7.27-7.38 (5H, m, ArH); **7b**: 1.40 (3H, s, CH3), 1.46 (3H, s, CH3), 3.08-3.10 (1H, dd, *J* 4.4 Hz and 2.0 Hz, C**2**H), 3.86 (1H, d, *J* 2.0 Hz, C**1**HPh), 3.91-3.95 (1H, dd, *J* 8.3 Hz and 6.4 Hz, C**4**H*H*), 4.14-4.17 (1H, dd, *J* 8.3 Hz and 6.4 Hz, C**4***H*H), 4.19-4.22 (1H, td, *J* 6.4 Hz, 4.4 Hz, C**3**H), 7.27-7.38 (5H, m, ArH); C (100 MHz, CDCl3) **7a**: 25.2 (CH3), 26.5 (CH3), 57.3 (CH), 62.2 (CH), 66.8 (CH), 75.9 (CH), 110.0 (C), 125.7 (CH), 128.5 (2CH), 136.4 (C); **7b**: 25.6 (CH3), 26.2 (CH3), 55.4 (CH), 61.9 (CH), 66.0 (CH), 75.0 (CH), 110.1 (C), 125.7 (CH), 128.5 (2CH), 136.6 (C); *m*/*z* (CI) 221 (MH+, 3 %), 163 (34), 121(47), 101 (97), 59 (100).

The only one *cis* epoxide (1*S*,2*S*)-1-Phenyl-2-[(*R*)-2,2-dimethyl-1,3-dioxolan-4-yl] oxirane (**7c**) was obtained as a pale yellow oil, R*f*(10 %EtOAc in petroleum) 0.33; max/cm-1 2987 (CH), 1253, 1212, 840; D25 +34.0 (CHCl3); H (400 MHz, CDCl3) 1.22 (3H, s, CH3), 1.45 (3H, s, CH3), 3.25-3.28 (1H, dd, *J* 8.3 Hz and 4.2 Hz, C**2**H), 3.53-3.58 (1H, ddd, *J* 8.3 Hz, 6.3 Hz and 5.0 Hz, C**3**H), 4.01-4.05 (1H, dd, *J* 8.8 Hz and 6.3 Hz, C**4***H*H), 4.06-4.10 (1H, dd, *J* 8.8 Hz and 5.0 Hz, C**4**H*H*), 4.21 (1H, d, *J* 4.2 Hz, C**1**HPh), 7.27-7.38 (5H, m, ArH); C (100 MHz, CDCl3) 25.2 (CH3), 26.8 (CH3), 57.4 (CH), 59.0 (CH), 67.7 (CH2), 71.6 (CH), 109.8 (C), 126.4 (CH), 127.9 (CH), 128.3 (CH), 134.3 (C); *m*/*z* (CI) 221 (MH+, 2 %), 163 (10), 117(17), 101 (100), 59 (26), (Found: M+, 220.1099. C13H16O3 requires M+, 220.2676).

**1-[5-(Phenylsulfonyl)-2-furyl]-2-[(*R*)-2,2-dimethyl-1,3-dioxolan-4-yl]oxirane (8).**

The mixture of two *trans* epoxides (1*S*,2*R*)-1-[5-(phenylsulfonyl)-2-furyl]-2-[(*R*)-2,2- dimethyl-1,3-dioxolan-4-yl]oxirane (**8a**) and (1*R*,2*S*)-1-[5-(phenylsulfonyl)-2- furyl]-2-[(*R*)-2,2-dimethyl-1,3-dioxolan-4-yl]oxirane (**8b**) was obtained as a pale yellow oil, R*f*(30 %EtOAc in petroleum) 0.33; max/cm-1 2988 (CH), 1330, 1245, 1142, 809; H (400 MHz, CDCl3) **8a**: 1.36 (3H, s, CH3), 1.44 (3H, s, CH3), 3.43-3.45 (1H, dd, *J* 5.6 Hz and 2.0 Hz, C**2**H), 3.82 (1H, d, *J* 2.0 Hz, C**1**H), 3.94-3.97 (1H, dd, *J* 8.3 Hz and 5.6 Hz, C**4**H*H*), 3.99-4.03 (1H, dt, *J* 6.3 Hz, 5.6 Hz, C**3**H), 4.14-4.17 (1H, dd, *J* 8.3 Hz and 6.3 Hz, C**4***H*H), 6.47-6.49 (1H, m, C**5**H), 7.16-7.18 (1H, m, C**6**H), 7.53-7.66 (3H, m, ArH**meta&para**), 7.97-8.01 (2H, m, ArH**ortho**); **8b**: 1.40 (3H, s, CH3), 1.46 (3H, s, CH3), 3.43-3.45 (1H, dd, *J* 5.6 Hz and 2.0 Hz, C**2**H), 3.90 (1H, d, *J* 2.0 Hz, C**1**H), 3.94-3.91 (1H, dd, *J* 8.3 Hz and 6.3 Hz, C**4**H*H*), 4.13-4.17 (1H, dd, *J* 8.3 Hz and 6.3 Hz, C**4***H*H), 4.21-4.25 (1H, td, *J* 6.3 Hz, 5.6 Hz, C**3**H), 6.47-6.49 (1H, m, C**5**H), 7.16-7.18 (1H, m, C**6**H), 7.53-7.66 (3H, m, ArH**meta&para**), 7.97-8.01 (2H, m, ArH**ortho**); C (100 MHz, CDCl3) **8a**: 25.2 (CH3), 26.5 (CH3), 50.2 (CH), 59.9 (CH), 66.7 (CH2), 75.0 (CH), 110.3 (C), 110.7 (CH), 118.3 (CH), 128.0 (C), 129.4 (C), 133.9 (CH), 139.9 (CH), 150.1 (CH), 155.4 (CH); **8b**: 25.6 (CH3), 26.1 (CH3), 48.7 (CH), 59.4 (CH), 66.0 (CH2), 73.9 (CH), 110.3 (C), 110.6 (CH), 118.3 (CH), 128.0 (C), 129.4 (C), 133.9 (CH), 139.8 (CH), 150.1 (CH), 155.5s (CH); *m*/*z* (CI) 351 (MH+, 3 %), 237 (44), 125 (100), 101 (95).

The only one *cis* epoxide (1*R*,2*R*)-1-[5-(phenylsulfonyl)-2-furyl]-2-[(*R*)-2,2- dimethyl-1,3-dioxolan-4-yl]oxirane (**8c**) was obtained as a pale yellow oil.: R*f*(30 %EtOAc in petroleum) 0.34; max/cm-1 2988 (CH), 1330, 1245, 1142, 809; D25 +37.5 (CHCl3); H (400 MHz, CDCl3) 1.25 (3H, s, CH3), 1.43 (3H, s, CH3), 3.26-3.29 (1H, dd, *J* 8.1 Hz and 4.0 Hz, C**2**H), 3.81-3.86 (1H, ddd, *J* 8.1 Hz, 6.3 Hz and 4.9 Hz, C**3**H), 4.01 (1H, d, *J* 4.0 Hz, C**1**H), 4.03-4.06 (1H, dd, *J* 8.8 Hz and 4.9 Hz, C**4***H*H), 4.10-4.14 (1H, dd, *J* 6.3 Hz and 8.8 Hz, C**4**H*H*), 6.47 (1H, m, C**5**H), 7.17-7.18 (1H, m, C**6**H), 7.53-7.66 (3H, m, ArH**meta&para**), 7.99-8.01 (2H, m, ArH**ortho**); C (100 MHz, CDCl3) 25.0 (CH3), 26.8 (CH3), 50.9 (CH), 59.0 (CH), 67.8 (CH2), 72.5 (CH), 110.0 (C), 111.1 (CH), 118.0 (CH), 127.9 (C), 129.3 (C), 133.8 (CH), 139.7 (CH), 150.1 (CH), 154.2 (CH); *m*/*z* (CI) 351 (MH+, 6 %), 291 (19), 125 (14), 101 (100), (Found: M+, 350.0823. C17H18SO6 requires M+, 350.3826).

**Reference:**

(1) This compound was previously prepared as a mixture of three (two *trans* and one *cis*) isomers, but was not fully characterized (only 1H NMR of the mixture was given). See: Aggarwal, V. K.; Abdel-Rahman, H.; Li, F.; Jones, R.; Standen, M. *Chem. Europ. J.* **1996**, *2*, 1024-1030.
